# Supplementary material for: Bis(4-nitroanilines) in interactions through a π-conjugated bridge: conformational effects and potential molecular switches
Source: Royal Society of Chemistry journal article supplement (doi:10.1039/c7nj02622f), 2017-01-01
Supplement: c7nj02622f1.pdf [file c7nj02622f1.pdf]

Supplementary information for manuscript:

**Bis(4-nitroanilines) in interaction through a  $\pi$ -conjugated bridge: conformational effects and potential molecular switches**

Tomás Guerrero, Rosa Santillan, Héctor García-Ortega, Omar G. Morales-Saavedra, Norberto Farfán, Pascal G. Lacroix.

**(B3PW91/6-31G\*) DFT computed conformations**

**1. Isomer *OFF* (E = 0) - No constraint**

|   |           |           |           |
|---|-----------|-----------|-----------|
| C | 5.464228  | 2.025491  | -8.534751 |
| H | 4.892097  | 2.949645  | -8.548472 |
| C | 6.826610  | 2.067404  | -8.178475 |
| C | 7.573689  | 0.850086  | -8.165608 |
| C | 6.940721  | -0.347713 | -8.508736 |
| H | 7.492787  | -1.279815 | -8.502645 |
| C | 5.596881  | -0.348448 | -8.856067 |
| C | 4.852222  | 0.833786  | -8.870788 |
| H | 3.804404  | 0.796442  | -9.145362 |
| C | 10.118975 | 0.919490  | -7.478125 |
| C | 8.943865  | 0.871722  | -7.799768 |
| C | 13.520160 | 2.111358  | -6.519497 |
| H | 14.044151 | 3.045506  | -6.342032 |
| C | 14.218176 | 0.895132  | -6.382881 |
| C | 13.525795 | -0.308665 | -6.617817 |
| H | 14.049680 | -1.254134 | -6.512850 |
| C | 12.188349 | -0.298580 | -6.975180 |
| H | 11.664355 | -1.232729 | -7.152635 |
| C | 11.490336 | 0.917646  | -7.111810 |
| C | 12.182712 | 2.121442  | -6.876853 |
| H | 11.658821 | 3.066912  | -6.981785 |
| C | 15.589541 | 0.893271  | -6.016580 |
| C | 16.764664 | 0.941024  | -5.694982 |
| C | 20.111933 | 2.160832  | -4.639125 |
| C | 20.856721 | 0.978711  | -4.625708 |
| H | 21.904624 | 1.015875  | -4.351396 |
| C | 20.244759 | -0.212843 | -4.962474 |
| H | 20.817073 | -1.136901 | -4.949962 |
| C | 18.882283 | -0.254640 | -5.318318 |
| C | 18.135023 | 0.962617  | -5.329837 |
| C | 18.767944 | 2.160215  | -4.985967 |
| H | 18.215765 | 3.092257  | -4.990940 |
| N | 7.440237  | 3.244774  | -7.879011 |
| H | 6.879772  | 4.057201  | -7.674911 |
| N | 18.268594 | -1.431808 | -5.618406 |
| H | 18.829037 | -2.244101 | -5.823115 |
| N | 4.953782  | -1.602498 | -9.208030 |
| O | 3.763149  | -1.568994 | -9.507867 |
| O | 5.636033  | -2.623332 | -9.185717 |
| N | 20.754976 | 3.414695  | -4.286348 |
| O | 20.072294 | 4.435282  | -4.306621 |
| O | 21.945572 | 3.380986  | -3.986397 |
| H | 8.359552  | 3.211083  | -7.462189 |
| H | 17.349203 | -1.397821 | -6.035030 |

## 2. Isomer *ON* state ( $E = 0$ )\* - No constraint

|   |           |           |           |
|---|-----------|-----------|-----------|
| C | 7.608951  | 0.291079  | 1.162022  |
| H | 8.192269  | 0.050544  | 2.047207  |
| C | 6.208135  | 0.148601  | 1.203726  |
| C | 5.447680  | 0.463034  | 0.036337  |
| C | 6.107516  | 0.898097  | -1.116433 |
| H | 5.545563  | 1.141639  | -2.010098 |
| C | 7.489735  | 1.024483  | -1.119164 |
| C | 8.246859  | 0.723585  | 0.015802  |
| H | 9.324288  | 0.835133  | -0.021510 |
| C | 2.822980  | 0.217978  | 0.119714  |
| C | 4.035434  | 0.334624  | 0.064494  |
| C | -0.721873 | 0.322590  | -1.013885 |
| H | -1.290831 | 0.594550  | -1.897618 |
| C | -1.404150 | -0.151816 | 0.124186  |
| C | -0.652607 | -0.501265 | 1.262601  |
| H | -1.164344 | -0.874698 | 2.144715  |
| C | 0.726764  | -0.380833 | 1.264144  |
| H | 1.292966  | -0.658473 | 2.148336  |
| C | 1.408999  | 0.093499  | 0.127228  |
| C | 0.657188  | 0.442987  | -1.012337 |
| H | 1.172393  | 0.809431  | -1.894897 |
| C | -2.818357 | -0.275190 | 0.114428  |
| C | -4.032509 | -0.372457 | 0.060236  |
| C | -7.541284 | -0.479191 | -1.159519 |
| C | -8.245930 | -0.740196 | 0.018317  |
| H | -9.325480 | -0.828780 | -0.019164 |
| C | -7.554758 | -0.878258 | 1.206227  |
| H | -8.096333 | -1.084533 | 2.125978  |
| C | -6.151622 | -0.761447 | 1.247584  |
| C | -5.445444 | -0.495097 | 0.035037  |
| C | -6.158615 | -0.356817 | -1.158969 |
| H | -5.638461 | -0.152892 | -2.087261 |
| N | 8.160317  | 1.481029  | -2.324547 |
| O | 9.383740  | 1.585188  | -2.291965 |
| O | 7.466801  | 1.736563  | -3.305034 |
| N | -8.268649 | -0.331001 | -2.408610 |
| O | -7.620796 | -0.100587 | -3.425959 |
| O | -9.491122 | -0.445114 | -2.373618 |
| N | -5.464876 | -0.928014 | 2.411680  |
| H | -5.963010 | -0.891729 | 3.287281  |
| H | -4.492591 | -0.655353 | 2.432397  |
| N | 5.579849  | -0.309536 | 2.321061  |
| H | 6.075830  | -0.321109 | 3.198288  |
| H | 4.574117  | -0.230891 | 2.368162  |

\* after steps 1 and 2 in Figure 4 (manuscript).
